# Supplementary material for: Evaluation of general health status in total hip arthroplasty patients, 30- year cohort study
Source: Research Square preprint supplement (doi:10.21203/rs.3.rs-6895475/v1), 2025-06-24
Supplement: Supplementary file 1 [file 82938f1d3e3b995387599c55.xlsx]

## Sheet: Table 1
Table 3. SF-36 outcomes between both study groups
Outcomes	Preoperative mean ± SD	Postoperative mean ± SD	Δ	P-value	Cohen´s d
Physical functioning (OA)	7.2±14.8	92.7±12.6	85.5	< 0.001	4.11
Physical functioning (PR)	0.0±0.0	97.0±9.0	97	< 0.001	10.75
Role physical (OA)	1.0±4.9	95.5±20.0	94.5	< 0.001	4.64
Role physical (PR)	11.7±12.5	100.0±0.0	88.3	< 0.001	7.07
Role emotional (OA)	4.7±15.1	95.3±20.2	90.7	< 0.001	3.73
Role emotional (PR)	16.3±16.7	100.0±0.0	83.7	< 0.001	5.02
Energy (OA)	42.3±18.7	65.0±11.4	22.7	< 0.001	1.22
Energy (PR)	56.1±9.3	71.0±8.3	14.9	< 0.001	1.36
Emotional well-being (OA)	55.3±20.7	82.4±17.4	27.1	< 0.001	1.11
Emotional well-being (PR)	64.1±19.2	86.1±10.9	22	< 0.001	0.83
Social functioning (OA)	26.8±22.0	75.8±20.3	49.1	< 0.001	1.94
Social functioning (PR)	17.5±13.5	96.7±6.1	79.2	< 0.001	5.51
Pain (OA)	27.4±24.3	81.6±14.7	54.2	< 0.001	2.09
Pain (PR)	16.3±14.9	94.3±10.8	78.1	< 0.001	4.21
General health (OA)	39.5±9.3	65.1±19.0	25.6	< 0.001	1.44
General health (PR)	19.8±12.3	50.2±9.3	30.4	< 0.001	1.86
Positive Δ values indicate an increase, while negative Δ values suggest a decrease
(improvement) on scales where a higher score reflects a worse status, such
WOMAC and VAS. The P value was calculated using paired t-tests, and Cohen's d
was used to interpret the effect size, with 0.2 considered small, 0.5 moderate, and
0.8 large.
