# Supplementary material for: Evaluation of general health status in total hip arthroplasty patients, 30- year cohort study
Source: Research Square preprint supplement (doi:10.21203/rs.3.rs-6895475/v1), 2025-06-24
Supplement: Supplementary file 2 [file a36b8785b381e3124b3e97aa.xlsx]

## Sheet: Table 1
Table 4. Evaluation of SF-36 differences between pathologies after surgery.
Outcomes	Mean OA group ± SD	Mean RP group ± SD	Mean Δ	IC 95 %	P-value
Physical functioning	92.7±12.6	97.0±9.0	4.3	-0.0–8.7	0.05
Role physical	95.5±20.0	100.0±0.0	4.5	-1.1–10.1	0.114
Role emotional	95.3±20.2	100.0±0.0	4.7	-1.0–10.3	0.105
Energy	65.0±11.4	71.0±8.3	6	2.1–10.0	0.003
Emotional well-being	82.4±17.4	86.1±10.9	3.7	-2.1–9.5	0.204
Social functioning	75.8±20.3	96.7±6.1	20.8	14.9–26.8	0
Pain	81.6±14.7	94.3±10.8	12.7	7.6–17.9	0
General health	65.1±19.0	50.2±9.3	-14.9	-20.8–-9.0	0
The values for each domain were compared using Student's t-test for independent
samples. The results include the mean Δ (difference between pathologies), its 95%
confidence interval, the P-value, and the effect size (Hedges g). An effect size of g
≥ 0.5 was considered clinically significant.
