# Supplementary material for: Evaluation of general health status in total hip arthroplasty patients, 30- year cohort study
Source: Research Square preprint supplement (doi:10.21203/rs.3.rs-6895475/v1), 2025-06-24
Supplement: Supplementary file 3 [file da7bf93456a1aa23ec3d24bc.xlsx]

## Sheet: Table 1
Table 2. Functional and pain scores between the two study groups
Funtional and pain outcomes	Preoperative mean ± SD	Postoperative mean ± SD	Δ	IC 95 % Δ	P-value
HHS	34.6±5.0	79.8±10.2	45.2	42.4–48.0	<0.001
(OA)
HHS	33.8±6.8	86.6±11.8	52.9	49.6–56.2	<0.001
(RP)
WOMAC (OA)	78.1±10.9	30.3±10.5	-47.7	-52.8–-42.6	<0.001
WOMAC	76.0±7.6	24.5±9.0	-51.6	-54.2–-48.9	<0.001
(RP)
NRS	8.4±0.8	2.6±1.5	-5.8	-6.3–-5.3	<0.001
(OA)
NRS	8.6±1.2	0.9±1.5	-7.6	-8.2–-7.1	<0.001
(RP)
The magnitude of the treatment effect (Cohen's d) were greater than or equal to 2
for the WOMAC and NRS and greater than or equal to 4 for the HHS. These values
indicate substantial improvements.
