# Supplementary material for: Evaluation of general health status in total hip arthroplasty patients, 30- year cohort study
Source: Research Square preprint supplement (doi:10.21203/rs.3.rs-6895475/v1), 2025-06-24
Supplement: Supplementary file 4 [file ec81764787fa712fd7c31e21.xlsx]

## Sheet: Table 1
Table 1. Complications related to THA between study groups
Complications	OA group (%)	RP group (%)	P-value
Septic loosening	6	0	0.083
Aseptic loosening	28	20	0.354
Periprosthetic fracture	2	4	0.562
Periprosthetic dislocation	4	2	0.562
Revision surgery	6	6	1
Polyethylene wear	10	8	0.73
Periprosthetic infection	4	2	0.562
Chronic pain	0	2	0.322
Sciatic nerve injury	0	2	0.322
Frequency of complications reported between groups
, and the P-value was estimated using the student’s t-test for binary variables
